# Supplementary material for: Genomic Analysis by Deep Sequencing of the Probiotic Lactobacillus brevis KB290 Harboring Nine Plasmids Reveals Genomic Stability
Source: PLoS One. 2013 Mar 27;8(3):e60521. doi: 10.1371/journal.pone.0060521 (PMC3609814; doi:10.1371/journal.pone.0060521)
Supplement: Table S3 — Metabolic pathways detected in L. brevis KB290 and ATCC 367. (XLS) [file pone.0060521.s008.xls]

## Sheet: Supplementary Table S3
Supplementary Table S3 Metabolic pathways detected in L. brevis KB290 and ATCC 367
Metabolic pathway		No. in L. brevis KB290	No. in L. brevis ATCC 367
Carbohydrate Metabolism
	Glycolysis / Gluconeogenesis	26	25
	Citrate cycle (TCA cycle)	5	5
	Pentose phosphate pathway	23	21
	Pentose and glucuronate interconversions	23	20
	Fructose and mannose metabolism	13	11
	Galactose metabolism	10	11
	Ascorbate and aldarate metabolism	1	0
	Starch and sucrose metabolism	10	11
	Amino sugar and nucleotide sugar metabolism	28	25
	Pyruvate metabolism	22	22
	Glyoxylate and dicarboxylate metabolism	3	3
	Propanoate metabolism	11	11
	Butanoate metabolism	11	13
	C5-Branched dibasic acid metabolism	2	2
	Inositol phosphate metabolism	2	2
Energy Metabolism
	Oxidative phosphorylation	13	13
	Photosynthesis	7	7
	Photosynthesis - antenna proteins	0	0
	Photosynthesis proteins	0	0
	Carbon fixation in photosynthetic organisms	6	6
	Carbon fixation pathways in prokaryotes	12	12
	Methane metabolism	19	19
	Nitrogen metabolism	8	8
	Sulfur metabolism	1	1
Lipid Metabolism
	Fatty acid biosynthesis	12	13
	Fatty acid elongation	0	0
	Fatty acid metabolism	7	7
	Synthesis and degradation of ketone bodies	2	3
	Cutin, suberine and wax biosynthesis	0	0
	Steroid biosynthesis	0	0
	Primary bile acid biosynthesis	1	1
	Secondary bile acid biosynthesis	1	1
	Steroid hormone biosynthesis	2	2
	Glycerolipid metabolism	16	16
	Glycerophospholipid metabolism	11	11
	Ether lipid metabolism	0	0
	Sphingolipid metabolism	3	3
	Arachidonic acid metabolism	1	1
	Linoleic acid metabolism	0	0
	alpha-Linolenic acid metabolism	0	0
	Biosynthesis of unsaturated fatty acids	2	3
	Lipid biosynthesis proteins	0	0
Nucleotide Metabolism
	Purine metabolism	45	44
	Pyrimidine metabolism	42	41
Amino Acid Metabolism
	Alanine, aspartate and glutamate metabolism	15	14
	Glycine, serine and threonine metabolism	6	6
	Cysteine and methionine metabolism	6	6
	Valine, leucine and isoleucine degradation	4	4
	Valine, leucine and isoleucine biosynthesis	3	3
	Lysine biosynthesis	9	9
	Lysine degradation	1	1
	Arginine and proline metabolism	13	12
	Histidine metabolism	1	1
	Tyrosine metabolism	12	12
	Phenylalanine metabolism	2	2
	Tryptophan metabolism	3	3
	Phenylalanine, tyrosine and tryptophan biosynthesis	1	1
	Amino acid related enzymes	0	0
Metabolism of Other Amino Acids
	beta-Alanine metabolism	1	1
	Taurine and hypotaurine metabolism	6	6
	Phosphonate and phosphinate metabolism	1	1
	Selenocompound metabolism	5	4
	Cyanoamino acid metabolism	5	5
	D-Glutamine and D-glutamate metabolism	3	3
	D-Arginine and D-ornithine metabolism	0	0
	D-Alanine metabolism	4	4
	Glutathione metabolism	9	8
Glycan Biosynthesis and Metabolism
	Glycosyltransferases	0	0
	N-Glycan biosynthesis	1	1
	Various types of N-glycan biosynthesis	0	0
	Mucin type O-glycan biosynthesis	0	0
	Other types of O-glycan biosynthesis	0	0
	Glycosaminoglycan biosynthesis - chondroitin sulfate	0	0
	Glycosaminoglycan biosynthesis - heparan sulfate	0	0
	Glycosaminoglycan biosynthesis - keratan sulfate	0	0
	Proteoglycans	0	0
	Glycosaminoglycan degradation	1	1
	Glycosylphosphatidylinositol(GPI)-anchor biosynthesis	0	0
	Glycosphingolipid biosynthesis - lacto and neolacto series	0	0
	Glycosphingolipid biosynthesis - globo series	1	1
	Glycosphingolipid biosynthesis - ganglio series	0	0
	Lipopolysaccharide biosynthesis	0	0
	Lipopolysaccharide biosynthesis proteins	0	0
	Peptidoglycan biosynthesis	18	18
	Other glycan degradation	2	2
Metabolism of Cofactors and Vitamins
	Thiamine metabolism	9	9
	Riboflavin metabolism	6	6
	Vitamin B6 metabolism	1	1
	Nicotinate and nicotinamide metabolism	7	6
	Pantothenate and CoA biosynthesis	8	7
	Biotin metabolism	1	1
	Lipoic acid metabolism	2	2
	Folate biosynthesis	2	2
	One carbon pool by folate	7	7
	Retinol metabolism	4	4
	Porphyrin and chlorophyll metabolism	4	4
	Ubiquinone and other terpenoid-quinone biosynthesis	5	5
Metabolism of Terpenoids and Polyketides
	Prenyltransferases	0	0
	Terpenoid backbone biosynthesis	11	11
	Monoterpenoid biosynthesis	0	0
	Sesquiterpenoid biosynthesis	0	0
	Diterpenoid biosynthesis	0	0
	Carotenoid biosynthesis	0	0
	Brassinosteroid biosynthesis	0	0
	Insect hormone biosynthesis	0	0
	Zeatin biosynthesis	1	1
	Limonene and pinene degradation	1	1
	Geraniol degradation	1	1
	Polyketide biosynthesis proteins	0	0
	Type I polyketide structures	0	0
	Biosynthesis of 12-, 14- and 16-membered macrolides	0	0
	Biosynthesis of ansamycins	1	1
	Biosynthesis of type II polyketide backbone	0	0
	Biosynthesis of type II polyketide products	0	0
	Tetracycline biosynthesis	4	4
	Polyketide sugar unit biosynthesis	5	0
	Nonribosomal peptide structures	0	0
	Biosynthesis of siderophore group nonribosomal peptides	1	0
	Biosynthesis of vancomycin group antibiotics	2	0
Biosynthesis of Other Secondary Metabolites
	Phenylpropanoid biosynthesis	1	1
	Stilbenoid, diarylheptanoid and gingerol biosynthesis	0	0
	Flavonoid biosynthesis	0	0
	Flavone and flavonol biosynthesis	1	1
	Anthocyanin biosynthesis	0	0
	Isoflavonoid biosynthesis	0	0
	Indole alkaloid biosynthesis	0	0
	Isoquinoline alkaloid biosynthesis	3	3
	Tropane, piperidine and pyridine alkaloid biosynthesis	1	1
	Acridone alkaloid biosynthesis	0	0
	Caffeine metabolism	0	0
	Betalain biosynthesis	0	0
	Glucosinolate biosynthesis	0	0
	Benzoxazinoid biosynthesis	0	0
	Penicillin and cephalosporin biosynthesis	0	0
	beta-Lactam resistance	1	1
	Streptomycin biosynthesis	7	2
	Butirosin and neomycin biosynthesis	1	1
	Clavulanic acid biosynthesis	0	0
	Puromycin biosynthesis	0	0
	Novobiocin biosynthesis	1	1
Xenobiotics Biodegradation and Metabolism
	Benzoate degradation	6	5
	Aminobenzoate degradation	5	4
	Fluorobenzoate degradation	0	0
	Chloroalkane and chloroalkene degradation	7	7
	Chlorocyclohexane and chlorobenzene degradation	1	1
	Toluene degradation	0	0
	Xylene degradation	1	1
	Nitrotoluene degradation	0	0
	Ethylbenzene degradation	1	1
	Styrene degradation	1	1
	Atrazine degradation	0	0
	Caprolactam degradation	0	0
	1,1,1-Trichloro-2,2-bis(4-chlorophenyl)ethane (DDT) degradation	0	0
	Bisphenol degradation	0	0
	Dioxin degradation	2	2
	Naphthalene degradation	6	6
	Polycyclic aromatic hydrocarbon degradation	1	1
	Metabolism of xenobiotics by cytochrome P450	4	4
	Drug metabolism - cytochrome P450	4	4
	Drug metabolism - other enzymes	7	7
Enzyme Families
	Enzymes	0	0
	Protein kinases	0	0
	Peptidases	0	0
	Cytochrome P450	0	0
Total		679	651
